# Supplementary material
Source: Springer Nature journal article supplement (https://www.springermedizin.de/resource/supplementary/12885_2007_1116_MOESM5_ESM.pdf/9471154)

**A**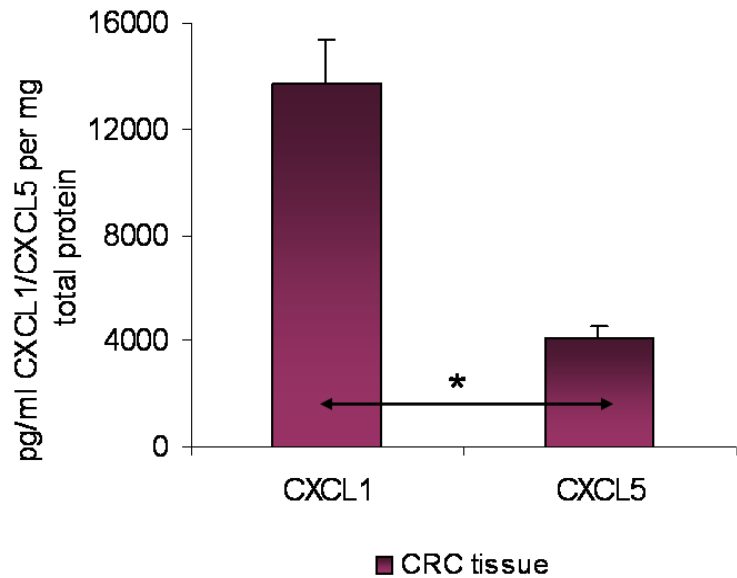**B**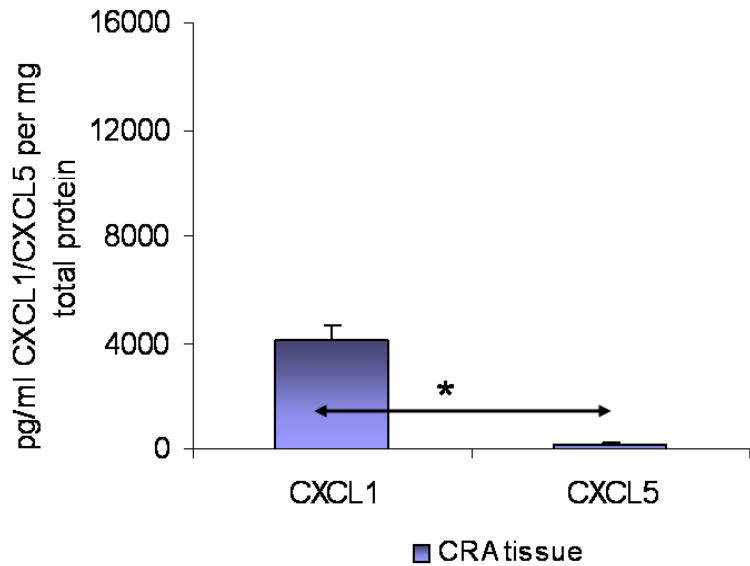

Supplement: MOESM5 [file 9471154]
